# Supplementary material for: Superconducting Ce2P3 and CeP2 with an interesting planar P layer
Source: Royal Society of Chemistry journal article supplement (doi:10.1039/d3tc03865c), 2024-01-01
Supplement: d3tc03865c1.pdf [file d3tc03865c1.pdf]

## Supplementary Information

### Superconducting $\text{Ce}_2\text{P}_3$ and $\text{CeP}_2$ with an interesting planar P layer

Xing Li<sup>1</sup>, Aitor Bergara<sup>2,3,4</sup>, Xiaohua Zhang<sup>1</sup>, Fei Li<sup>1</sup>, Yong Liu<sup>1</sup>, and Guochun Yang<sup>1\*</sup>

<sup>1</sup>*State Key Laboratory of Metastable Materials Science & Technology and Key Laboratory for Microstructural Material Physics of Hebei Province, School of Science, Yanshan University, Qinhuangdao 066004, China*

<sup>2</sup>*Physics Department and EHU Quantum Center, Universidad del País Vasco-Euskal Herriko Unibertsitatea, UPV/EHU, 48080 Bilbao, Spain*

<sup>3</sup>*Donostia International Physics Center (DIPC), 20018 Donostia, Spain*

<sup>4</sup>*Centro de Física de Materiales CFM, Centro Mixto CSIC-UPV/EHU, 20018 Donostia, Spain*

\*Corresponding Authors E-mail: yanggc468@nenu.edu.cn; yanggc@ysu.edu.cn

| <b>Index</b>                                                                                                                                                           | <b>Page</b> |
|------------------------------------------------------------------------------------------------------------------------------------------------------------------------|-------------|
| 1. Computational details.....                                                                                                                                          | 3           |
| 2. Phonon dispersion curves of the stable Ce-P compounds.....                                                                                                          | 5           |
| 3. The crystal structures of the stable Ce-P compounds.....                                                                                                            | 7           |
| 4. The COHP of the shortest P1-P2 pair and the longest P1-P1/P2 pair in <i>Pmma</i> Ce <sub>2</sub> P <sub>3</sub> at 100 GPa.....                                     | 8           |
| 5. The ELF maps of <i>Pmma</i> Ce <sub>2</sub> P <sub>3</sub> at 100 GPa.....                                                                                          | 9           |
| 6. The phonon dispersion curves and main vibrational modes contributing to the superconductivity of <i>Pmma</i> Ce <sub>2</sub> P <sub>3</sub> at 100 GPa.....         | 9           |
| 7. The electronic band structure of <i>P6/mmm</i> CeP <sub>2</sub> at 0 GPa.....                                                                                       | 10          |
| 8. The Fermi surfaces of <i>P6/mmm</i> CeP <sub>2</sub> at 0 GPa.....                                                                                                  | 10          |
| 9. The Fermi surface nesting function $\zeta(Q)$ of <i>P6/mmm</i> CeP <sub>2</sub> at 0 GPa.....                                                                       | 11          |
| 10. Pressure-dependent projected density of states of <i>P6/mmm</i> CeP <sub>2</sub> .....                                                                             | 11          |
| 11. Convergence tests of the $\lambda$ and $T_c$ versus different smearing parameters $\sigma$ for electrons and phonons in <i>P6/mmm</i> CeP <sub>2</sub> .....       | 11          |
| 11. Evolution of total enthalpy and snapshots of the <i>P6/mmm</i> CeP <sub>2</sub> and <i>Pmma</i> Ce <sub>2</sub> P <sub>3</sub> at 300 K from AIMD simulations..... | 12          |
| 12. Length and ICOHP of the Ce/La-P pair and volume of <i>P6/mmm</i> CeP <sub>2</sub> and LaP <sub>2</sub> at 0 GPa.....                                               | 12          |
| 13. Structural information of predicted stable Ce-P phases.....                                                                                                        | 12          |
| 14. Elastic constants of <i>P6/mmm</i> CeP <sub>2</sub> at 0 GPa and <i>Pmma</i> Ce <sub>2</sub> P <sub>3</sub> at 50 GPa. ....                                        | 14          |
| 15. References.....                                                                                                                                                    | 14          |

## Computational Details

The structure prediction method was based on a global minimization of free energy surfaces combining ab initio total energy calculations, as implemented in the CALYPSO (Crystal Structure ANALysis by Particle Swarm Optimization) code.<sup>1, 2</sup> The structures of  $Ce_xP_y$  ( $x = 1, y = 0.5, 1, 1.5, 2-7$ ;  $x = 3, y = 1-2$ ) were searched with simulation cell sizes of 1-4 formula units (f.u.) at the selected pressures of 1 atm, and 25, 50, 100, 200, and 300 GPa. In the first step, random structures with certain symmetry were constructed, where atomic coordinates were generated by crystallographic symmetry operations. Local optimizations<sup>3</sup> using the VASP code were done with the conjugate gradients method and stopped when enthalpy changes became smaller than  $1 \times 10^{-5}$  eV per cell. After processing the first generation structures, 60% of them with lower enthalpies were selected to construct the next generation with PSO (Particle Swarm Optimization). 40% of the structures in the new generation were randomly generated. A structure fingerprinting technique of bond characterization matrix was applied to the generated structures, so that identical structures were strictly forbidden. These procedures significantly enhanced the diversity of the structures, which was crucial for structural global search efficiency. In most cases, structural searching simulations for each calculation were stopped after generating 1000 ~ 1200 structures (e.g., about 20 ~ 30 generations).

To further analyze the structures with higher accuracy, we selected a number of structures with lower enthalpies and perform a structural optimization using density functional theory within the generalized gradient approximation as implemented in the VASP code.<sup>4</sup> In all the calculations, the cutoff energy for the expansion of wavefunctions in plane waves was set to 600 eV, and the Monkhorst-Pack  $k$ -mesh with a grid spacing of  $2\pi \times 0.03 \text{ \AA}^{-1}$  was selected to meet the energy convergence within  $\sim 1$  meV/atom. The electron-ion interaction was described by projector-augmented-wave potentials with  $5s^25p^64f^15d^16s^2$  and  $3s^23p^3$  configurations treated as valence electrons for Ce and P atoms, respectively.

Bonding was investigated by the crystal orbital Hamiltonian population (COHP) analysis using the LOBSTER code,<sup>5</sup> which provides an atom-specific measure of the bonding character of states in a given energy region, and the strength and origin of interatomic interactions can be obtained through the output file "COHPCAR.lobster". The Bader charge analysis<sup>6</sup> was used to determine charge transfer by analyzing the output file "ACF.dat". The electron localization function (ELF) was used to describe and visualize chemical bonds in stable compounds,<sup>7</sup> which is achieved by putting the output file "ELFCAR" into the VESTA software.<sup>8</sup> The phonon calculations were carried out by using supercell finite-displacement method as implemented in the PHONOPY code.<sup>9</sup> The electron-phonon coupling calculations were carried out with the density functional perturbation theory as executed in the QUANTUM ESPRESSO package.<sup>10</sup> We employed

the pseudopotentials with Ce.pbe-spdn-rrkjus\_psl.1.0.0.UPF and P.pbe-n-rrkjus\_psl.0.1.UPF for Ce and P atoms in  $Pmma$   $Ce_2P_3$ , and Ce.pz-sp-hgh.UPF and P.pz-n-rrkjus\_psl.0.1.UPF for Ce and P atoms in  $P6/mmm$   $CeP_2$ , respectively. The considered kinetic energy cutoff and width were 70 Ry and 0.02 Ry, respectively. To reliably calculate the electron-phonon coupling in metallic systems we need to sample dense  $k$ -meshes for electronic Brillouin zone integration and enough  $q$ -meshes for evaluating average contributions from the phonon modes. Depending on the specific structures of the stable compounds, different  $k$ -meshes and  $q$ -meshes were used:  $6 \times 9 \times 8$   $k$ -meshes and  $2 \times 3 \times 4$   $q$ -meshes for  $Ce_2P_3$  in the  $Pmma$  structure at 100, 75 and 50 GPa,  $18 \times 18 \times 18$   $k$ -meshes and  $6 \times 6 \times 6$   $q$ -meshes for  $CeP_2$  in the  $P6/mmm$  structure at 16.5, 11, 5.5, and 0 GPa. We have calculated the superconducting  $T_c$  of Ce-P compounds as estimated from the McMillan-Allen-Dynes formula:<sup>11</sup>

$$T_c = \frac{\omega_{log}}{1.2} \exp\left[ -\frac{1.04(1 + \lambda)}{\lambda - \mu^* (1 + 0.62\lambda)} \right]$$

Here,  $\mu^*$  is the Coulomb pseudopotential ( $\mu^* = 0.1$ ). In addition, the EPC parameter,  $\lambda$ , and the logarithmic average phonon frequency,  $\omega_{log}$  were calculated via the Eliashberg spectral function for the electron-phonon interaction:

$$\alpha^2 F(\omega) = \frac{1}{N(E_F)} \sum_{kq,v} |g_{k,k+q,v}|^2 \delta(\varepsilon_k) \delta(\varepsilon_{k+q}) \delta(\omega - \omega_{q,v})$$

where  $\lambda = 2 \int d\omega \frac{\alpha^2 F(\omega)}{\omega}$ ;  $\omega_{log} = \exp\left[ \frac{2}{\lambda} \int \frac{d\omega}{\omega} \alpha^2 F(\omega) \ln(\omega) \right]$ . Here,  $N(E_F)$  is the electronic density of states at the Fermi level,  $\omega_{q,v}$  is the phonon frequency of mode  $v$  and wave vector  $q$ , and  $|g_{k,k+q,v}|$  is the electron-phonon matrix element between two electronic states with momenta  $k$  and  $k+q$  at the Fermi level.<sup>12,</sup>

13

The temperature dependence of the superconducting gap ( $\Delta$ ) of  $CeP_2$  at 0 GPa is explored. The electronic-phonon interpolation technique applied in the electron-phonon Wannier (EPW) code,<sup>14</sup> which is based on the maximum localized Wannier function, is an efficient and accurate method to calculate the superconducting gaps and  $T_c$ . The width of the Fermi surface window is set 0.15 eV and the Dirac  $\delta$  functions are replaced by Lorentzians of widths ( $\sigma$ ) 0.025 eV and 0.1 meV for electrons and phonons, respectively. The precedent computations of the electronic wave functions required for the Wannier interpolations are carried out within a uniform unshifted BZ  $k$ -mesh of  $6 \times 6 \times 6$ . An interpolated  $k$ -point grid of  $72 \times 72 \times 72$  and  $q$ -point grid of  $24 \times 24 \times 24$  are set to solve the anisotropic Migdal-Eliashberg equations. The fermion Matsubara

frequencies cutoff is set to be 1 eV, a reasonable setting is 4 times higher than the largest phonon frequency, our setting is 10 times higher. The Morel-Anderson pseudopotential  $\mu_c^*$  is set 0.13.

### **Supplementary Figures**

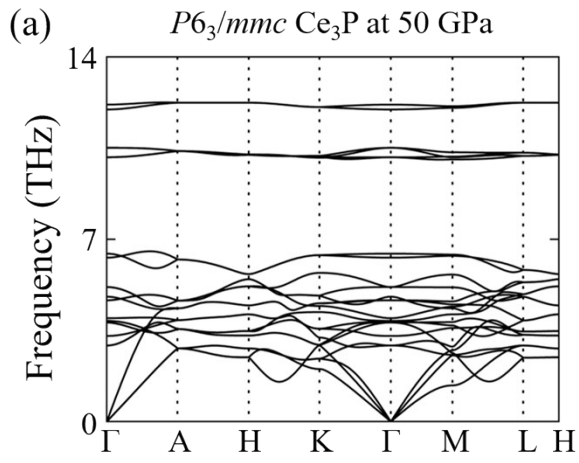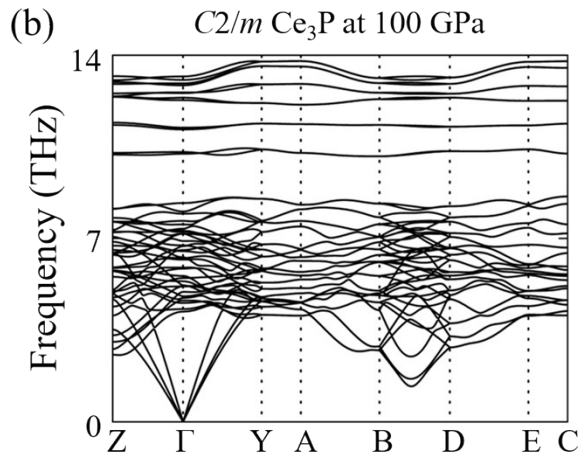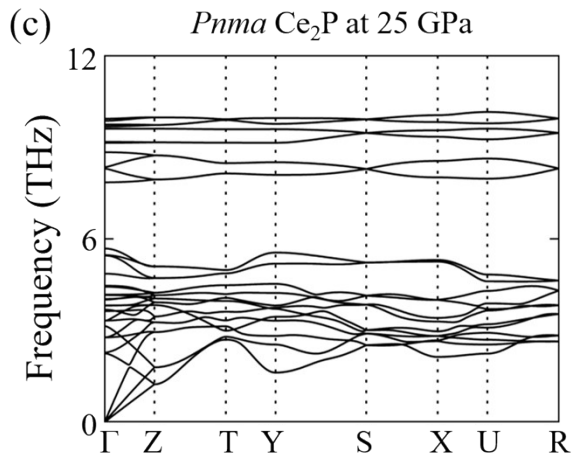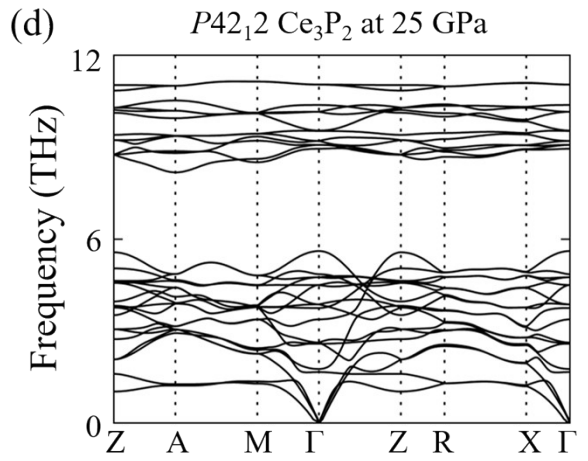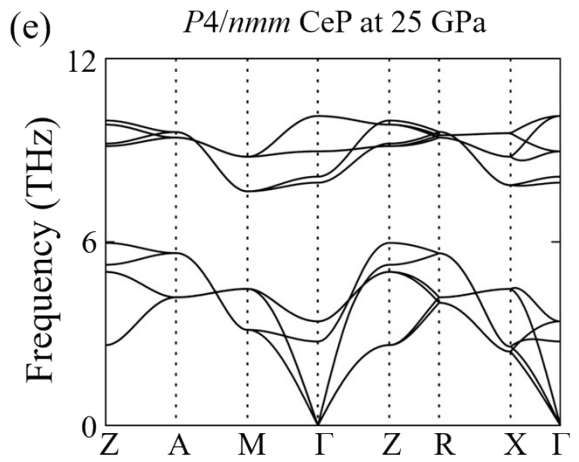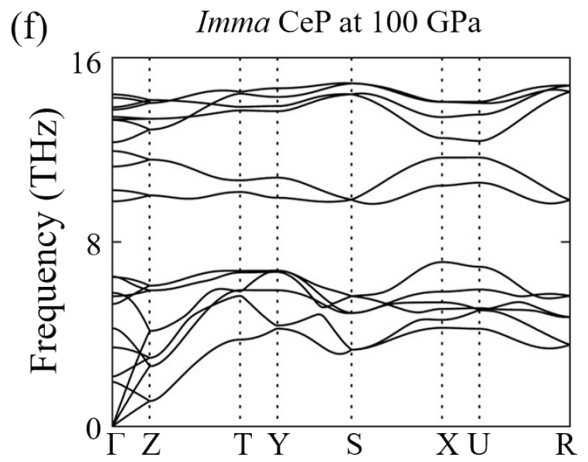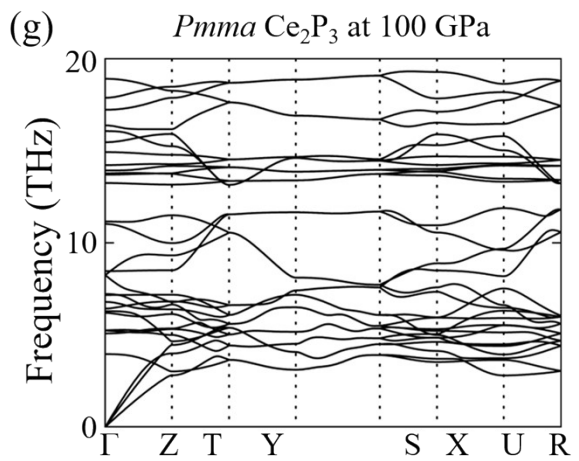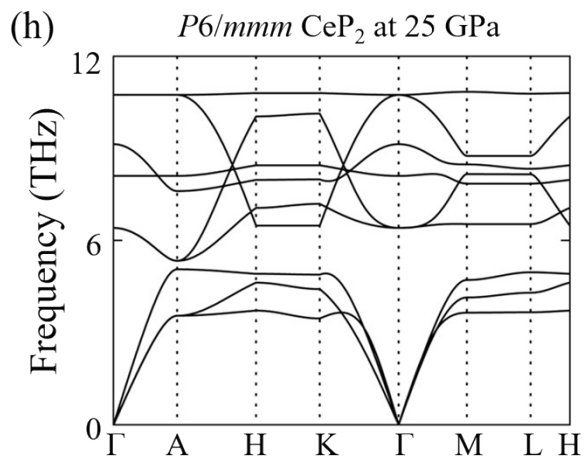

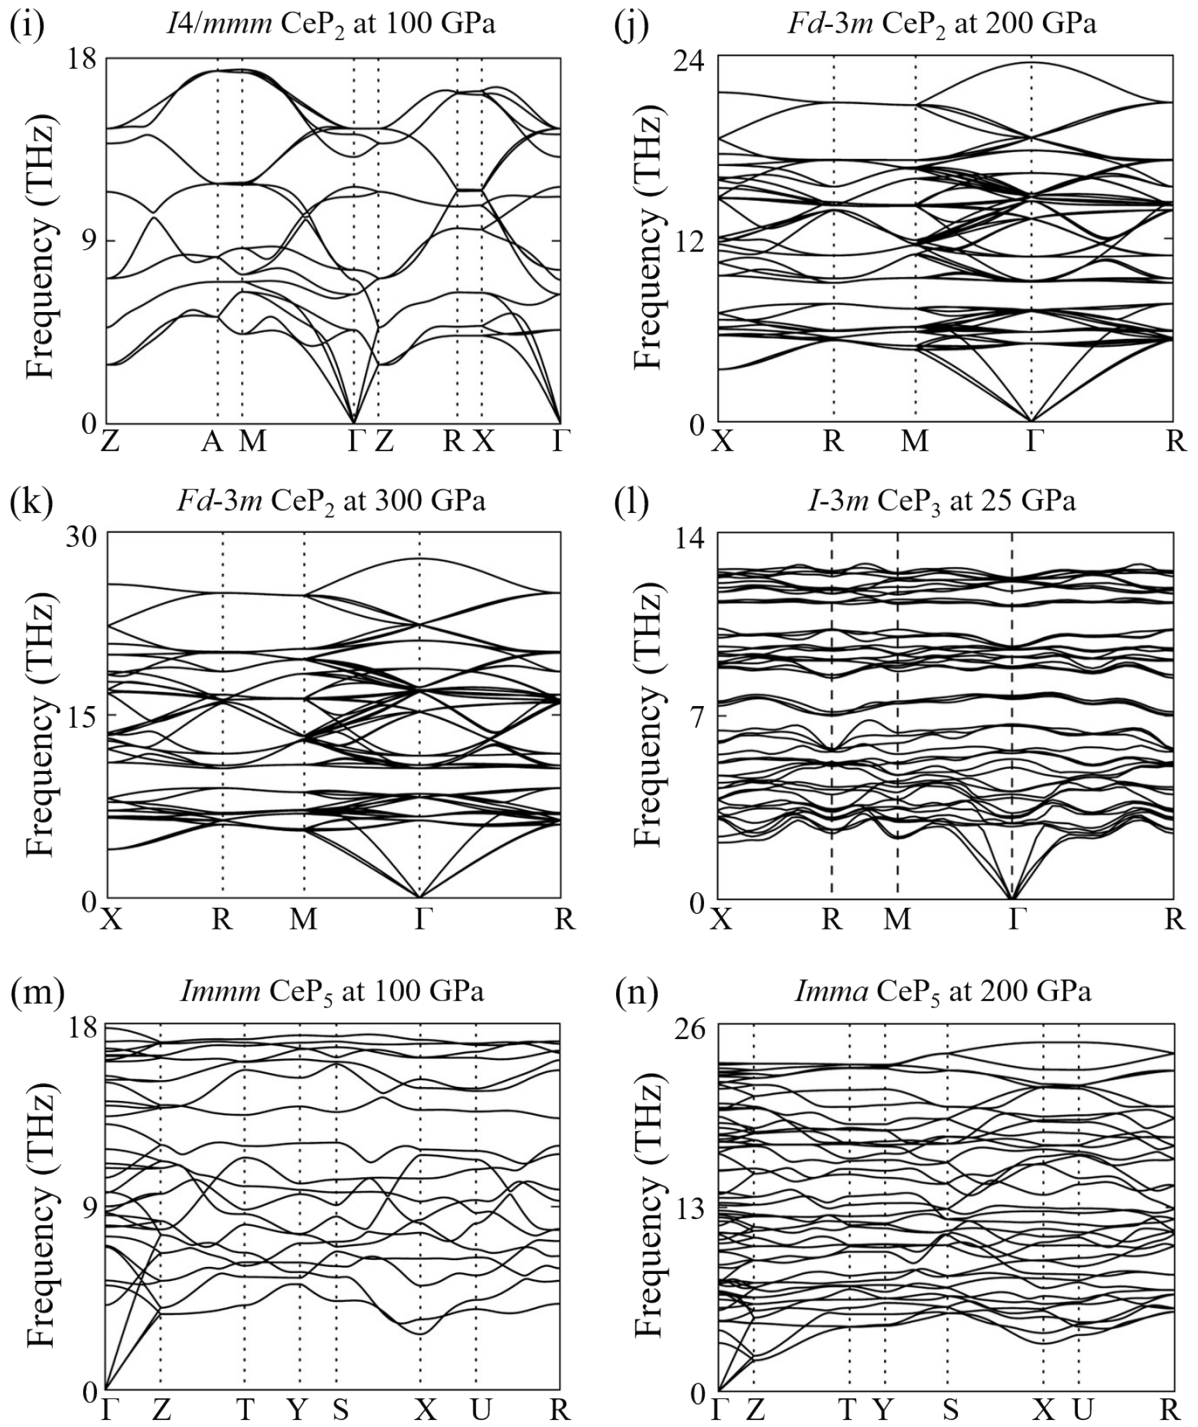

**Fig. S1.** Phonon dispersion curves of the stable Ce-P compounds.

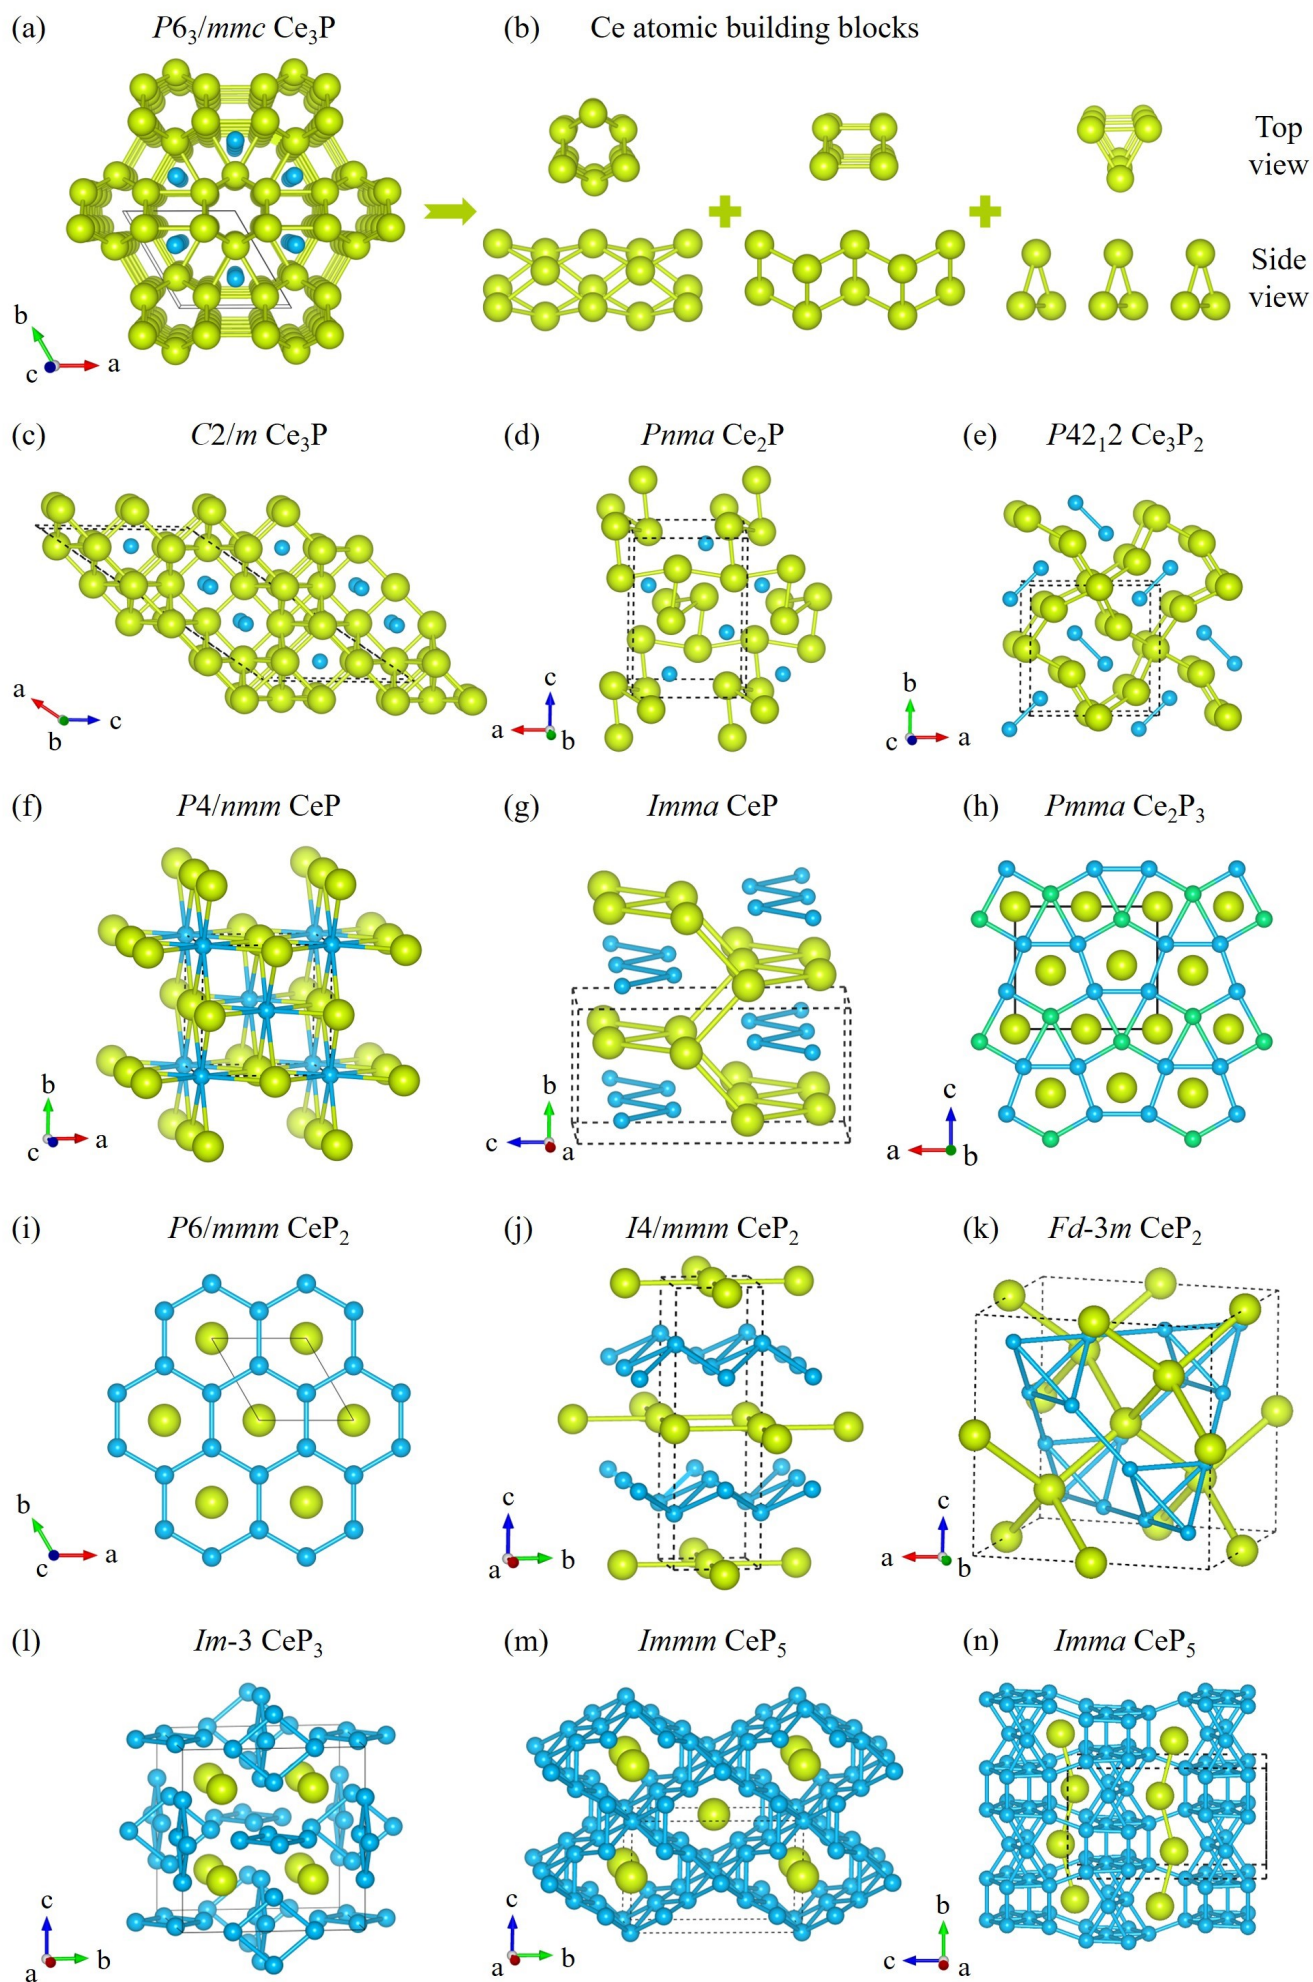



**Fig. S2.** The crystal structures of the stable Ce-P compounds.

For these Ce-P compounds, the degree of aggregation of the P atomic structural units increases with P content, which changes from a single atom in  $C2/m$   $Ce_3P$ ,  $P6_3/mmc$   $Ce_3P$ , and  $Pnma$   $Ce_2P$ , to a dimer in  $P4_212$   $Ce_3P_2$ , to a zigzag chain in  $Imma$   $CeP$ , to a wrinkled layer in  $I4/mmm$   $CeP_2$  or planar layer in  $Pmma$   $Ce_2P_3$  and  $P6/mmm$   $CeP_2$ , and, eventually, to a three-dimensional framework in  $Fd-3m$   $CeP_2$  and  $Immm/Imma$   $CeP_5$ . The same variation trend can be found with increasing the Ce content. The crystal structure of  $Im-3$   $CeP_3$  can be considered a new skutterudite-like compound. More interestingly, it shows dynamical stability and superconductivity at ambient pressure, which will be discussed in detail elsewhere.

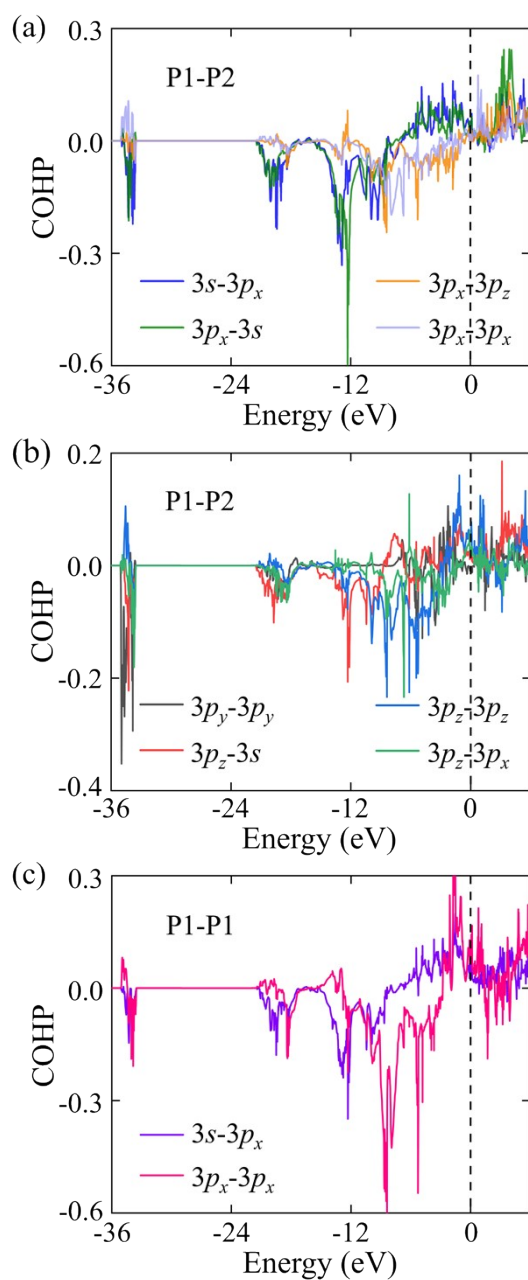

**Fig. S3.** The COHP of (a) the shortest P1-P2 pair and (b-c) the longest P1-P1/P2 pair in  $Pmma$   $Ce_2P_3$  at 100 GPa.

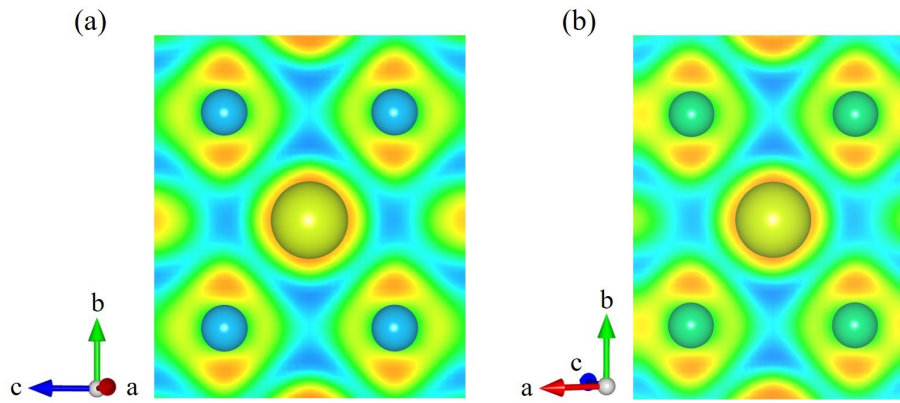

**Fig. S4.** The ELF maps of *Pmma*  $\text{Ce}_2\text{P}_3$  at 100 GPa.

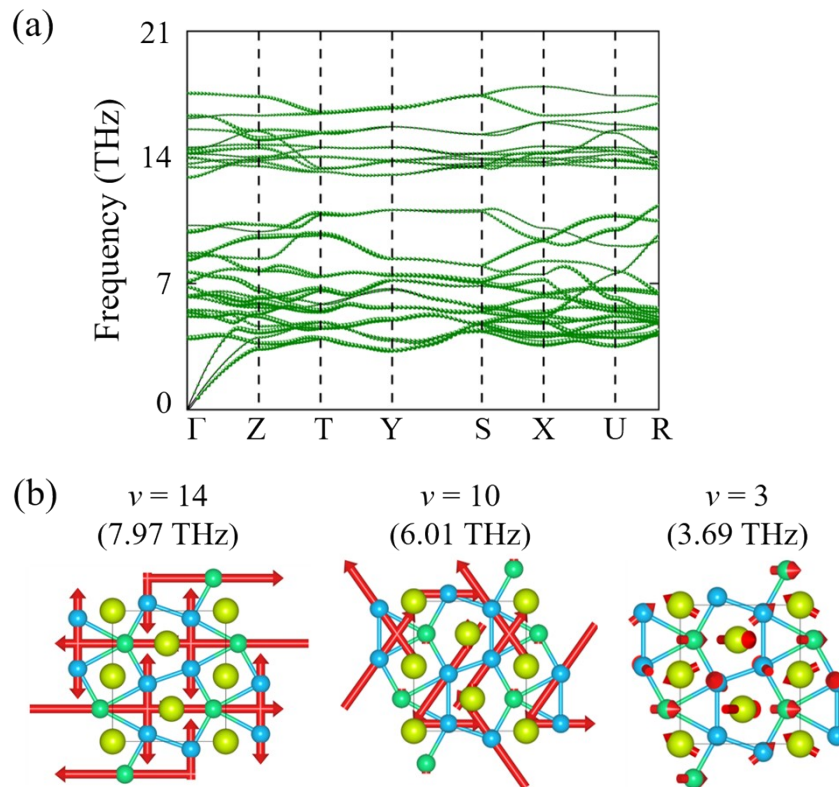

**Fig. S5.** (a) The phonon dispersion curves (the magnitude of  $\lambda$  is indicated by the thickness of the green curves), and (b) main vibrational modes contributing to the superconductivity of *Pmma*  $\text{Ce}_2\text{P}_3$  at 100 GPa, where  $\nu$  represents the sequence number of the phonon curve from bottom to top.

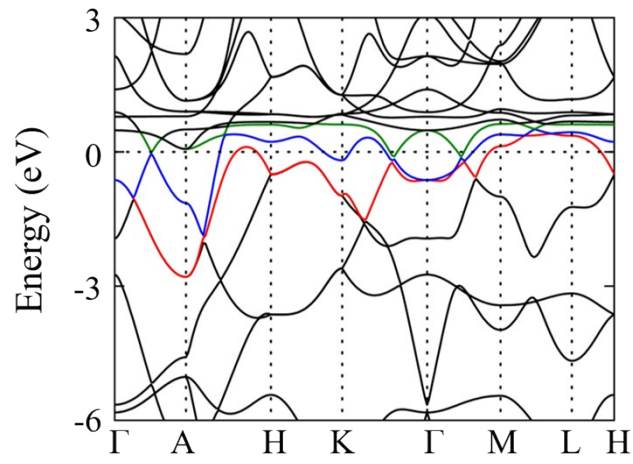

**Fig. S6.** The electronic band structure of  $P6/mmm$   $CeP_2$  at 0 GPa.

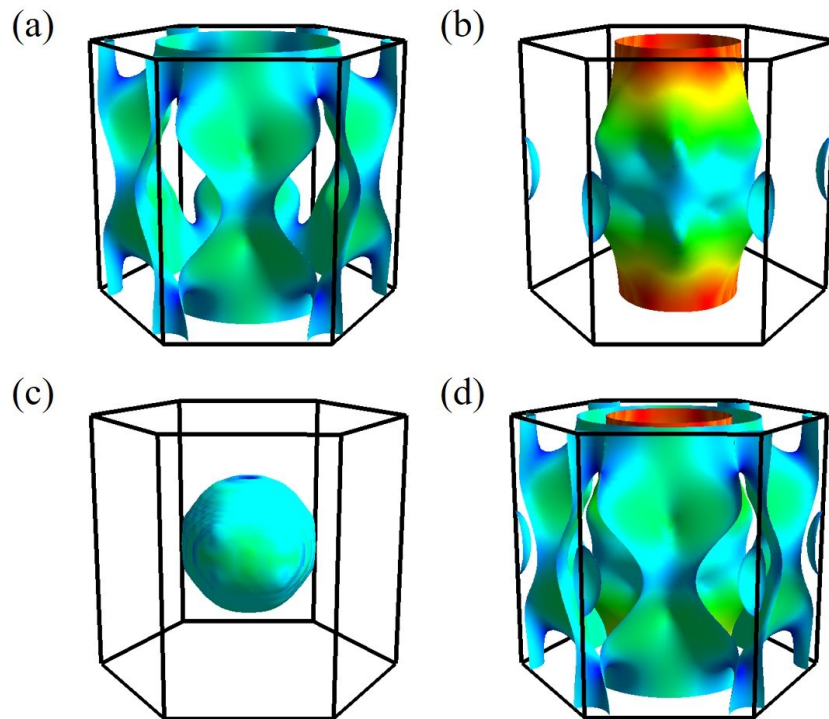

**Fig. S7.** (a-c) The Fermi surfaces associated to bands crossing the Fermi level of  $P6/mmm$   $CeP_2$  at 0 GPa, and (d) the side view of merged Fermi surfaces.

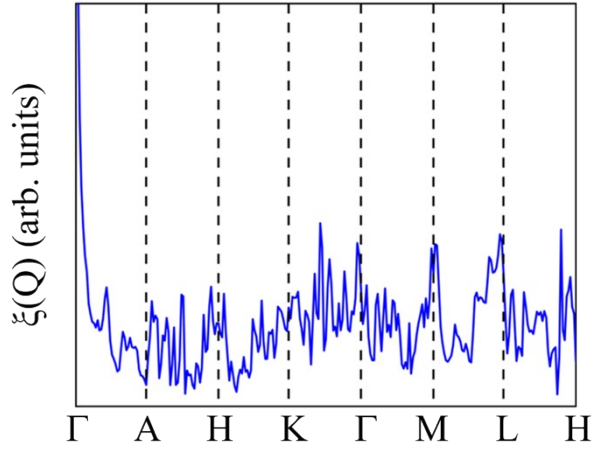

**Fig. S8.** The Fermi surface nesting function  $\xi(Q)$  of  $P6/mmm$  CeP<sub>2</sub> at 0 GPa.

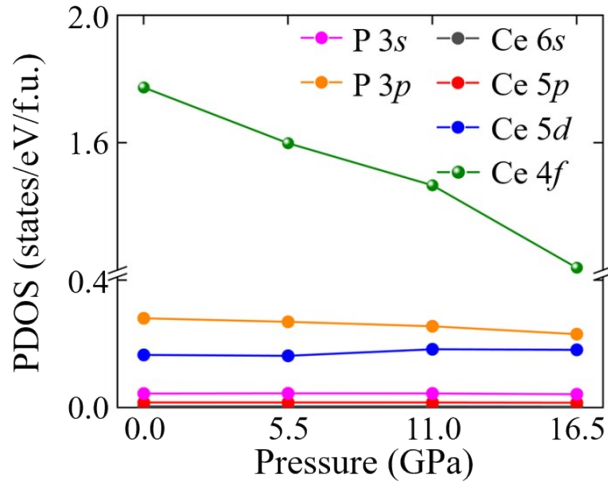

**Fig. S9.** Pressure-dependent projected density of states (PDOS) of  $P6/mmm$  CeP<sub>2</sub>.

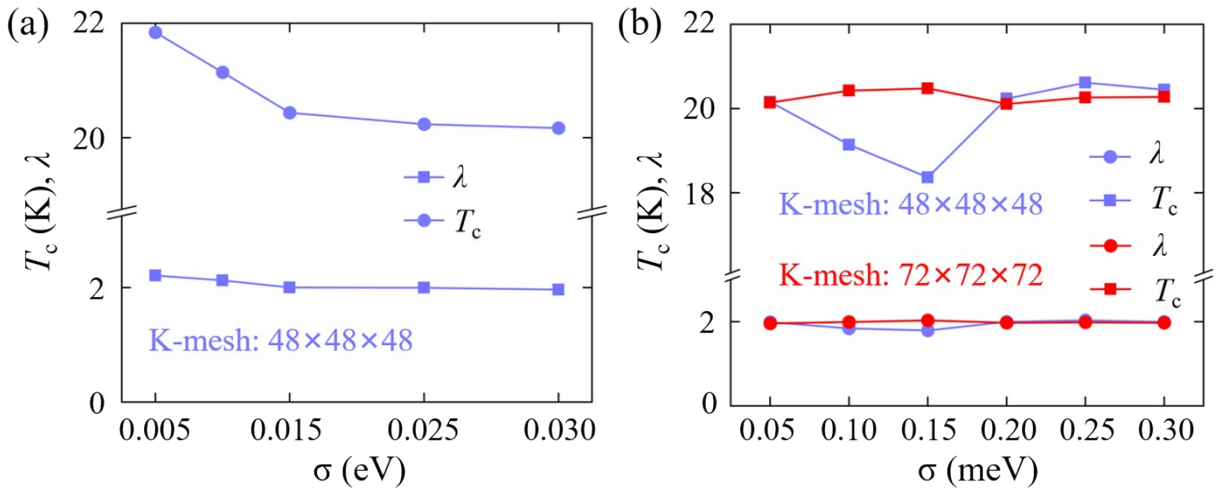

**Fig. S10.** Convergence tests of the  $\lambda$  and  $T_c$  versus different smearing parameters  $\sigma$  for (a) electrons and (b) phonons in  $P6/mmm$  CeP<sub>2</sub>. Here, we choose 0.025 eV and 0.1 meV for electrons and phonons due to their good convergence.

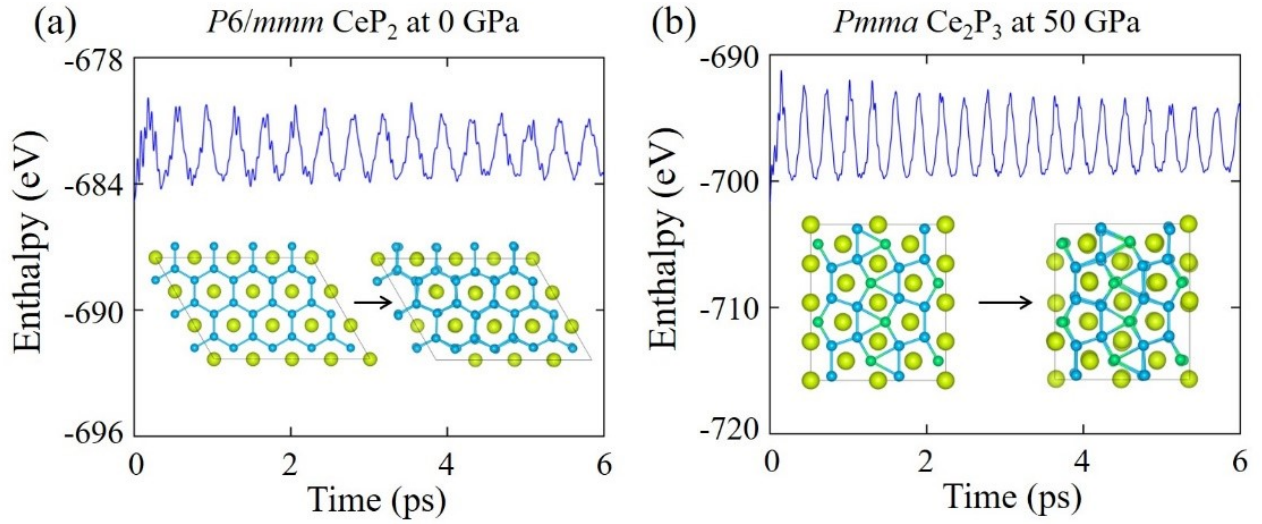

**Fig. S11.** Evolution of total enthalpy and snapshots of the (a)  $P6/mmm$   $CeP_2$  and (b)  $Pmma$   $Ce_2P_3$  at 300 K from AIMD simulations.

## Supplementary Tables

**Table S1.** Length and ICOHP of the Ce/La-P pair and volumes of  $P6/mmm$   $CeP_2$  and  $LaP_2$  at 0 GPa.

| Phase            | Pressure (GPa) | Volume ( $\text{\AA}^3$ ) | Length of Ce-P pair ( $\text{\AA}$ ) | ICOHP of Ce-P pair (eV/Pair) | Length of La-P pair ( $\text{\AA}$ ) | ICOHP of La-P pair (eV/Pair) |
|------------------|----------------|---------------------------|--------------------------------------|------------------------------|--------------------------------------|------------------------------|
| $P6/mmm$ $CeP_2$ | 0              | 49.946                    | 2.928                                | -1.152                       | -                                    | -                            |
| $P6/mmm$ $LaP_2$ | 0              | 62.679                    | -                                    | -                            | 3.170                                | -0.615                       |

**Table S2.** Structural information of the predicted stable Ce-P phases.

| Phases         | Pressure (GPa) | Lattice Parameters ( $\text{\AA}, \circ$ ) | atoms  | Wyckoff Positions (fractional) |        |        |
|----------------|----------------|--------------------------------------------|--------|--------------------------------|--------|--------|
|                |                |                                            |        | x                              | y      | z      |
| $Pnma$ $Ce_2P$ | 25             | a = 5.7653                                 | Ce(4c) | -0.8443                        | 0.7500 | 0.0463 |
|                |                | b = 4.5319                                 | P(4c)  | -0.3959                        | 0.7500 | 0.7789 |
|                |                | c = 8.2786                                 | P(4c)  | -0.6645                        | 0.2500 | 0.8811 |
|                |                | $\alpha = 90.0000$                         |        |                                |        |        |
|                |                | $\beta = 90.0000$                          |        |                                |        |        |
|                |                | $\gamma = 90.0000$                         |        |                                |        |        |

|                                                        |     |              |        |        |         |        |
|--------------------------------------------------------|-----|--------------|--------|--------|---------|--------|
| <i>P4<sub>2</sub>12</i> Ce <sub>3</sub> P <sub>2</sub> | 25  | a = 6.9857   | Ce(4e) | 0.1800 | 0.8200  | 0.0000 |
|                                                        |     | b = 6.9857   | Ce(2c) | 0.5000 | 0.0000  | 0.4050 |
|                                                        |     | c = 3.7241   | P(4f)  | 0.3831 | 0.6169  | 0.5000 |
|                                                        |     | α = 90.0000  |        |        |         |        |
|                                                        |     | β = 90.0000  |        |        |         |        |
|                                                        |     | γ = 90.0000  |        |        |         |        |
| <i>P4/nmm</i> CeP                                      | 25  | a = 4.6468   | Ce(2c) | 0.5000 | 0.0000  | 0.5537 |
|                                                        |     | b = 4.6468   | P(2a)  | 0.0000 | 0.0000  | 0.0000 |
|                                                        |     | c = 3.2310   |        |        |         |        |
|                                                        |     | α = 90.0000  |        |        |         |        |
|                                                        |     | β = 90.0000  |        |        |         |        |
|                                                        |     | γ = 90.0000  |        |        |         |        |
| <i>P6/mmm</i> CeP <sub>2</sub>                         | 25  | a = 3.8905   | Ce(1a) | 0.0000 | 0.0000  | 0.0000 |
|                                                        |     | b = 3.8905   | P(2d)  | 0.3333 | 0.6667  | 0.5000 |
|                                                        |     | c = 3.6106   |        |        |         |        |
|                                                        |     | α = 90.0000  |        |        |         |        |
|                                                        |     | β = 90.0000  |        |        |         |        |
|                                                        |     | γ = 120.0000 |        |        |         |        |
| <i>P6<sub>3</sub>/mmc</i> Ce <sub>3</sub> P            | 50  | a = 5.8199   | Ce(6h) | 0.1724 | -1.6552 | 1.2500 |
|                                                        |     | b = 5.8199   | P(2d)  | 0.6667 | -0.6667 | 1.2500 |
|                                                        |     | c = 4.3824   |        |        |         |        |
|                                                        |     | α = 90.0000  |        |        |         |        |
|                                                        |     | β = 90.0000  |        |        |         |        |
|                                                        |     | γ = 120.0000 |        |        |         |        |
| <i>Pmma</i> Ce <sub>2</sub> P <sub>3</sub>             | 50  | a = 6.3402   | Ce(2a) | 1.0000 | 0.0000  | 0.0000 |
|                                                        |     | b = 4.1236   | Ce(2e) | 0.7500 | 0.0000  | 0.5215 |
|                                                        |     | c = 5.4803   | P(2f)  | 1.2500 | 0.5000  | 0.1089 |
|                                                        |     | α = 90.0000  | P(4j)  | 1.0544 | 0.5000  | 0.6903 |
|                                                        |     | β = 90.0000  |        |        |         |        |
|                                                        |     | γ = 90.0000  |        |        |         |        |
| <i>C2/m</i> Ce <sub>3</sub> P                          | 100 | a = 13.7598  | Ce(4i) | 0.8786 | 0.0000  | 0.1950 |
|                                                        |     | b = 3.7713   | Ce(4i) | 0.1279 | 0.0000  | 0.3242 |
|                                                        |     | c = 7.6586   | Ce(4i) | 0.8724 | 0.5000  | 0.9358 |
|                                                        |     | α = 90.0000  | P(4i)  | 0.1228 | 0.5000  | 0.5651 |
|                                                        |     | β = 146.5235 |        |        |         |        |
|                                                        |     | γ = 90.0000  |        |        |         |        |
| <i>Imma</i> CeP                                        | 100 | a = 3.2448   | Ce(4e) | 0.5000 | 0.7500  | 0.6133 |
|                                                        |     | b = 3.9626   | P(4e)  | 0.0000 | 0.2500  | 0.6500 |
|                                                        |     | c = 7.8986   |        |        |         |        |
|                                                        |     | α = 90.0000  |        |        |         |        |
|                                                        |     | β = 90.0000  |        |        |         |        |
|                                                        |     | γ = 90.0000  |        |        |         |        |

|                                |     |                    |        |        |        |        |  |
|--------------------------------|-----|--------------------|--------|--------|--------|--------|--|
| <i>I4/mmm</i> CeP <sub>2</sub> | 100 | a = 2.7904         | Ce(2b) | 0.5000 | 0.5000 | 0.0000 |  |
|                                |     | b = 2.7904         | P(4e)  | 0.0000 | 0.0000 | 0.8002 |  |
|                                |     | c = 8.9938         |        |        |        |        |  |
|                                |     | $\alpha = 90.0000$ |        |        |        |        |  |
|                                |     | $\beta = 90.0000$  |        |        |        |        |  |
|                                |     | $\gamma = 90.0000$ |        |        |        |        |  |
| <i>Immm</i> CeP <sub>5</sub>   | 100 | a = 3.3249         | Ce(2c) | 0.0000 | 0.0000 | 0.5000 |  |
|                                |     | b = 7.6728         | P(8l)  | 0.0000 | 0.3307 | 0.7082 |  |
|                                |     | c = 5.0409         | P(2a)  | 0.0000 | 0.0000 | 0.0000 |  |
|                                |     | $\alpha = 90.0000$ |        |        |        |        |  |
|                                |     | $\beta = 90.0000$  |        |        |        |        |  |
|                                |     | $\gamma = 90.0000$ |        |        |        |        |  |
| <i>Fd-3m</i> CeP <sub>2</sub>  | 200 | a = 6.1258         | Ce(8b) | 0.0000 | 0.0000 | 0.5000 |  |
|                                |     | b = 6.1258         | P(16c) | 0.1250 | 0.1250 | 0.1250 |  |
|                                |     | c = 6.1258         |        |        |        |        |  |
|                                |     | $\alpha = 90.0000$ |        |        |        |        |  |
|                                |     | $\beta = 90.0000$  |        |        |        |        |  |
|                                |     | $\gamma = 90.0000$ |        |        |        |        |  |
| <i>Imma</i> CeP <sub>5</sub>   | 200 | a = 3.7001         | Ce(4e) | 0.5000 | 1.2500 | 0.0358 |  |
|                                |     | b = 5.6806         | P(4e)  | 0.0000 | 0.7500 | 0.7954 |  |
|                                |     | c = 10.0278        | P(8h)  | 0.0000 | 0.5614 | 0.0927 |  |
|                                |     | $\alpha = 90.0000$ | P(8h)  | 0.0000 | 1.0763 | 0.6941 |  |
|                                |     | $\beta = 90.0000$  |        |        |        |        |  |
|                                |     | $\gamma = 90.0000$ |        |        |        |        |  |

**Table S3.** Elastic constants of *P6/mmm* CeP<sub>2</sub> at 0 GPa and *Pmma* Ce<sub>2</sub>P<sub>3</sub> at 50 GPa.

|           | <i>P6/mmm</i> CeP <sub>2</sub> | <i>Pmma</i> Ce <sub>2</sub> P <sub>3</sub> |         |
|-----------|--------------------------------|--------------------------------------------|---------|
| C11 (N/m) | 215.548                        | C11 (N/m)                                  | 334.810 |
| C12 (N/m) | 121.984                        | C12 (N/m)                                  | 146.028 |
| C13 (N/m) | 87.355                         | C13 (N/m)                                  | 33.135  |
| C33 (N/m) | 276.864                        | C22 (N/m)                                  | 410.442 |
| C44 (N/m) | 83.353                         | C23 (N/m)                                  | 167.417 |
| C66 (N/m) | 46.782                         | C33 (N/m)                                  | 314.640 |
|           |                                | C44 (N/m)                                  | 227.514 |
|           |                                | C55 (N/m)                                  | 137.698 |
|           |                                | C66 (N/m)                                  | 209.870 |

## References

- 1 Y. Wang, J. Lv, L. Zhu and Y. Ma, *Phys. Rev. B*, 2010, **82**, 094116.
- 2 Y. Wang, J. Lv, L. Zhu and Y. Ma, *Comput. Phys. Commun.*, 2012, **183**, 2063-2070.
- 3 G. Kresse and J. Furthmüller, *Phys. Rev. B*, 1996, **54**, 11169.

- 4 J. Hafner, *J. Comput. Chem.*, 2008, **29**, 2044-2078.
- 5 R. Nelson, C. Ertural, J. George, V. L. Deringer, G. Hautier and R. Dronskowski, *J. Comput. Chem.*, 2020, **41**, 1931-1940.
- 6 W. Tang, E. Sanville and G. Henkelman, *J. Phys.: Condens. Matter*, 2009, **21**, 084204.
- 7 A. D. Becke and K. E. Edgecombe, *J. Chem. Phys.*, 1990, **92**, 5397-5403.
- 8 K. Momma and F. Izumi, *J. Appl. Cryst.*, 2011, **44**, 1272-1276.
- 9 S. Baroni, S. de Gironcoli, A. Dal Corso and P. Giannozzi, *Rev. Mod. Phys.*, 2001, **73**, 515-562.
- 10 P. Giannozzi, S. Baroni, N. Bonini, M. Calandra, R. Car, C. Cavazzoni, D. Ceresoli, G. L. Chiarotti, M. Cococcioni and I. Dabo, *J. Phys: Condens. Matter*, 2009, **21**, 395502.
- 11 P. B. Allen and R. C. Dynes, *Phys. Rev. B*, 1975, **12**, 905.
- 12 J. P. Carbotte, *Rev. Mod. Phys.*, 1990, **62**, 1027.
- 13 P. B. Allen and B. Mitrović, *Solid State Phys.*, 1983, **37**, 1-92.
- 14 S. Poncé, E. R. Margine, C. Verdi and F. Giustino, *Comput. Phys. Commun.*, 2016, **209**, 116-133.
